# Non-HDL Cholesterol: Into the Spotlight

The elevated coronary heart disease (CHD) risk affecting patients with type 2 diabetes may be attributed to a combined dyslipidemia characterized by elevated triglycerides, reduced HDL cholesterol, small dense LDL particles (independent of the LDL cholesterol level), elevated triglyceride-rich remnant lipoproteins (TGRLs), and/or elevated apolipoprotein B (apoB) levels (1). All of these features have individually been implicated as contributors to CHD. Some reports suggest that the combined dyslipidemia may confer a higher magnitude of risk than elevated LDL cholesterol alone (2).

The role of triglycerides as a risk factor has been controversial. Much of its risk may be attributed to the associated low HDL cholesterol level, along with contributions from all of the other related variables. Although triglycerides do appear to be an independent risk factor (3), they likely act only as a marker for these associated features. The measurement of apoB has been advocated as an alternative index (4). Since each LDL particle contains a single apoB molecule, the apoB level reflects particle number, thus not only accounting for both remnant and LDL particles but also the density of particles when expressed in relation to particle cholesterol content. Despite these advantages, even the global standardization of apoB assays (5) has not made it routinely available to the clinician. This may be in part due to a general unfamiliarity with its interpretation outside of the research setting and because existing guidelines do not take advantage of the information it imparts. Its cost relative to its potential advantages for clinical decision-making also has not been adequately explored.

Existing guidelines, however, do take advantage of non-HDL cholesterol as an index of risk associated with this combined dyslipidemia. The recognition of this index is not new; this "beta" lipoprotein cholesterol fraction has been associated with increased CHD mortality in population-based studies that began in the 1950s (6). Non-HDL cholesterol is simply defined as the difference be-

tween total and HDL cholesterol and, thus, represents cholesterol carried on all of the potentially proatherogenic apoB-containing particles [primarily VLDL, IDL, and LDL as well as chylomicron remnants and lipoprotein(a)]. Many reports confirm a strong correlation between non-HDL cholesterol and apoB (7). In assessing the value of non-HDL cholesterol, it should be remembered that our routine determination of LDL cholesterol is not a measurement, but rather a calculation based on a measurement of triglycerides, total cholesterol, and HDL cholesterol, using the formula of Friedewald (8). The calculated LDL cholesterol level has been shown to be significantly different than a direct LDL cholesterol measurement by ultracentrifugation in type 2 diabetic patients (9). In fact, its very nature is to exclude the cholesterol of TGRLs, which are proatherogenic. Thus, for diabetic patients with the combined dyslipidemia, calculated LDL cholesterol fails to be an adequate index of overall lipid-associated risk.

The Third Adult Treatment Panel (ATP III) of the National Cholesterol Education Program (NCEP) has recommended the use of non-HDL cholesterol as a secondary target of lipid lowering, after achieving adequate control of LDL cholesterol and if triglycerides are elevated ( $\geq 200$  mg/dl) (10). Because of its simple calculation, the non-HDL cholesterol level is easily available to the clinician with every lipid profile ordered, thus eliminating any additional costs. Because it circumvents the measurement of triglycerides, it avoids the potential limitation of triglycerides as a mere marker of CHD risk and instead directly reflects the cholesterol content of all particles that may be proatherogenic. Also, its derivation does not require a lipid profile to be done in the fasting state, and it avoids the potential inaccuracy caused by the inherent intraindividual variability of the triglyceride measurements. A routine calculated LDL cholesterol level cannot circumvent most of these limitations. The Friedewald equation requires a fasting triglyceride level  $< 400$  mg/dl in order to accurately calculate LDL cholesterol.

Thus, in many cases of fasting hypertriglyceridemia common in diabetes, the clinician has no reliable estimate of LDL cholesterol, and therefore no objective index of lipid-associated CHD risk, unless ultracentrifugation is performed. Recently, an immunoseparation technique for a direct LDL cholesterol determination has been proposed as an alternative to the labor-intensive ultracentrifugation reference method. However, comparison studies demonstrate that in some hypertriglyceridemic samples, a significant bias (usually an overestimate) still exists with this method (11,12). Whiting et al. (13) have reported that the error of this method as a function of hypertriglyceridemia in diabetic patients is greater than that of the Friedewald calculation. In contrast, the non-HDL cholesterol level of a hypertriglyceridemic patient would still be available to the clinician, and could potentially be more accurate than either the directly measured or the calculated LDL cholesterol level (14). Non-HDL cholesterol thus represents a readily obtainable, inexpensive, and convenient measure of CHD risk that may be superior to LDL cholesterol in many respects. All that remains is for its reliability as a predictor of CHD risk to be established. The article by Lu et al. (15) in this issue of *Diabetes Care* highlights the predictive value of non-HDL cholesterol for CHD and the role that it may play in the management of diabetic dyslipidemia.

Many cross-sectional and prospective studies have demonstrated the value of non-HDL cholesterol as an index of CHD risk across different populations, including Europeans (6,16,17), Hawaiians (18), and cohorts in the U.S. (19–21). Non-HDL cholesterol appears to track with multiple CHD risk factors in U.S. ethnic minorities that are disproportionately affected by diabetes (22–24). Previous studies in diabetic subjects also used surrogate indexes such as intima-media thickness (25,26). In these respects, the article of Lu et al. (15) adds to the literature by establishing, in a prospective study, the predictive value of non-HDL cholesterol for clinical end points in a high-risk, ethnic diabetic population.

Few other reports have simultaneously examined the predictive value of non-HDL cholesterol and LDL cholesterol for CHD. The Honolulu Heart Program found the multivariate relative risk of non-HDL cholesterol to be no different than that of total or LDL cholesterol among elderly men of Japanese ancestry (18). In the SHEP Study cohort, LDL cholesterol was an independent predictor of CHD if triglycerides were  $<400$  mg/dl, while non-HDL cholesterol was an independent predictor regardless of the triglyceride level (20). The Lipid Research Clinics (LRC) Program Follow-up Study found that the highest quartile of non-HDL cholesterol predicted CHD events while that of LDL cholesterol failed to do so in women. Also, the highest quartile of non-HDL cholesterol predicted all-cause mortality while that of LDL cholesterol failed to do so in either sex (21). The report of Lu et al. (15) demonstrated higher hazard ratios for the highest tertile of non-HDL cholesterol than that of LDL cholesterol, although the respective confidence intervals overlapped significantly. The difference between the findings of these latter two studies may be due to the larger number of participants, longer follow-up, and the higher baseline LDL and non-HDL cholesterol levels in the LRC study. Even if non-HDL cholesterol and LDL cholesterol are equivalent in their predictive power, the relative convenience and greater reliability of non-HDL cholesterol should make it the preferred index for use in clinical practice.

The incidence of type 2 diabetes is growing globally (27), and CHD accounts for the majority of type 2 diabetes-related morbidity and mortality. Given that non-HDL cholesterol is a simple, reliable, and reproducible index of overall CHD risk that may be equivalent, if not superior, to LDL cholesterol, should it be our primary lipid treatment target for patients with type 2 diabetes?

Such use of non-HDL cholesterol has been proposed for diabetic patients (1) as well as the general population (14,21,28). However, Grundy (29) points out that for non-HDL cholesterol to replace LDL cholesterol as the primary lipid target for the general population, strong evidence of its superiority will be needed. At present, such evidence is not yet available. Nevertheless, the NCEP has clearly acknowledged the importance of non-HDL cholesterol for patients with hypertriglyc-

eridemia, which may include those with type 2 diabetes. The findings of Lu et al. (15) now shift the weight of evidence further in favor of the primacy of non-HDL cholesterol specifically for patients with type 2 diabetes.

For non-HDL cholesterol to be more applicable to clinical practice, additional studies are needed in other populations to verify its consistency as an independent predictor of CHD. Also, effective prediction of risk is often less meaningful if effective treatments are not available, and in this respect, intervention studies that report a lowering of non-HDL cholesterol (30–36) need to be supported by additional studies examining clinical end points. The Helsinki Heart Study (37), as one example, reported significant lowering of non-HDL cholesterol along with reduced CHD events, although the benefits of gemfibrozil in this landmark trial clearly extend beyond non-HDL cholesterol alone. It has also been suggested that the use of non-HDL cholesterol will not completely eliminate the need for a fasting triglyceride level. When an elevated non-HDL cholesterol level warrants drug treatment, the clinician must determine whether to use as first-line therapy an agent that targets LDL cholesterol (HMG-CoA reductase inhibitor or bile acid sequestrant) or one that targets VLDL cholesterol (fibrin acid derivative or niacin). In such cases, a measure of fasting triglycerides and calculation of LDL cholesterol will still be needed.

Lu et al. (15) also report that the ratio of total to HDL cholesterol (TC/HDL) was a strong predictor of CHD, although the confidence intervals again overlapped significantly. A reanalysis of data from the LRC cohorts (38) also reported similar findings for TC/HDL. Thus, in the search for the optimum index of risk, TC/HDL should also be compared.

Despite these obstacles, further studies of non-HDL cholesterol must be undertaken. If future studies in diabetic patients can confirm its superiority over LDL cholesterol, perhaps the NCEP or their international counterparts will recommend in future consensus statements the use of non-HDL cholesterol as the primary lipid target for patients with type 2 diabetes. For now, however, sufficient evidence exists for non-HDL cholesterol to at least move squarely into the spotlight and be scrutinized for its po-

tential utility in the management of diabetic dyslipidemia.

STANLEY H. HSIA, MD

From the Charles R. Drew University of Medicine and Science, Los Angeles, California.

Address correspondence to Stanley H. Hsia, MD, Charles R. Drew University of Medicine and Science, 1731 East 120th St., Los Angeles, CA 90059. E-mail: sthsia@cdrewu.edu.

## References

1. Garg A, Grundy SM: Management of dyslipidemia in NIDDM. *Diabetes Care* 13: 153–169, 1990
2. Assmann G, Schulte H: Relation of high-density lipoprotein cholesterol and triglycerides to incidence of atherosclerotic coronary artery disease (the PROCAM experience). *Am J Cardiol* 70:733–737, 1992
3. Austin MA, Hokanson JE, Edwards KL: Hypertriglyceridemia as a cardiovascular risk factor. *Am J Cardiol* 81 (Suppl. 4A): 7B–12B, 1998
4. Sniderman AD, Silberberg J: Is it time to measure apolipoprotein B? *Arterioscler* 10:665–667, 1990
5. Marcovina SM, Albers JJ, Dati F, Ledue TB, Ritchie RF: International Federation of Clinical Chemistry standardization project for measurement of apolipoproteins A-I and B. *Clin Chem* 37:1676–1682, 1991
6. Keys A, Karvonen MJ, Punsar S, Menotti A, Fidanza F, Farchi G: HDL serum cholesterol and 24-year mortality of men in Finland. *Intl J Epidemiol* 13:428–435, 1984
7. Abate N, Vega GL, Grundy SM: Variability in cholesterol content and physical properties of lipoproteins containing apolipoprotein B-100. *Atheroscler* 104:159–171, 1993
8. Friedewald WT, Levy RI, Fredrickson DS: Estimation of the concentration of low-density lipoprotein cholesterol in plasma, without use of the preparative ultracentrifuge. *Clin Chem* 18:499–502, 1972
9. Rubies-Prat J, Reverter JL, Senti M, Pedro-Botet J, Salinas I, Lucas A, Nogues X, Sanmarti A: Calculated low-density lipoprotein cholesterol should not be used for management of lipoprotein abnormalities in patients with diabetes mellitus. *Diabetes Care* 16:1081–1086, 1993
10. Expert Panel on Detection, Evaluation, and Treatment of High Blood Cholesterol in Adults: Executive summary of the third report of the National Cholesterol Education Program (NCEP) Expert Panel on Detection, Evaluation, and Treatment of High Blood Cholesterol in Adults (Adult Treatment Panel III). *JAMA* 285:2486–2496, 2001

11. McNamara JR, Cole TG, Contois JH, Ferguson CA, Ordovas JM, Schaefer EJ: Immunoseparation method for measuring low-density lipoprotein cholesterol directly from serum evaluated. *Clin Chem* 41:232–240, 1995
12. Pisani T, GebSKI CP, Leary ET, Warnick GR, Ollington JF: Accurate direct determination of low-density lipoprotein cholesterol using an immunoseparation reagent and enzymatic cholesterol assay. *Arch Pathol Lab Med* 119:1127–1135, 1995
13. Whiting MJ, Shephard MDS, Tallis GA: Measurement of plasma LDL cholesterol in patients with diabetes. *Diabetes Care* 20:12–14, 1997
14. Havel RJ, Rapaport E: Management of primary hyperlipidemia. *N Engl J Med* 332:1491–1498, 1995
15. Lu W, Resnick HE, Jablonski KA, Jones KL, Jain AK, Howard WJ, Robbins DC, Howard BV: Non-HDL cholesterol as a predictor of cardiovascular disease in type 2 diabetes: the Strong Heart Study. *Diabetes Care* 26:16–23, 2003
16. Menotti A, Kromhout D, Nissinen A, Giampaoli S, Seccareccia F, Feskens E, Pekkanen J, Tervahauta M: Short-term all-cause mortality and its determinants in elderly male populations in Finland, the Netherlands, and Italy: the FINE Study. *Prev Med* 25:319–326, 1996
17. Lehto S, Ronnema T, Haffner SM, Pyorala K, Kallio V, Laakso M: Dyslipidemia and hyperglycemia predict coronary heart disease events in middle-aged patients with NIDDM. *Diabetes* 46:1354–1359, 1997
18. Reed D, Benfante R: Lipid and lipoprotein predictors of coronary heart disease in elderly men in the Honolulu Heart Program. *Ann Epidemiol* 2:29–34, 1992
19. Schaefer EJ, Lamon-Fava S, Cohn SD, Schaefer MM, Ordovas JM, Castelli WP, Wilson PWF: Effects of age, gender, and menopausal status on plasma low density lipoprotein cholesterol and apolipoprotein B levels in the Framingham Offspring Study. *J Lipid Res* 35:779–792, 1994
20. Frost PH, Davis BR, Burlando AJ, Curb JD, Guthrie GP, Isaacsohn JL, Wassertheil-Smolter S, Wilson AC, Stamler J, the Systolic Hypertension in the Elderly Research Group: Serum lipids and incidence of coronary heart disease: findings from the Systolic Hypertension in the Elderly Program (SHEP). *Circulation* 94:2381–2388, 1996
21. Cui Y, Blumenthal RS, Flaws JA, White-man MK, Langenberg P, Bachorik PS, Bush TL: Non-high-density lipoprotein cholesterol level as a predictor of cardiovascular disease mortality. *Arch Int Med* 161:1413–1419, 2001
22. Winkleby MA, Kraemer HC, Ahn DK, Varady AN: Ethnic and socioeconomic differences in cardiovascular disease risk factors: findings for women from the Third National Health and Nutrition Examination Survey, 1988–1994. *JAMA* 280:356–362, 1998
23. Sundquist J, Winkleby MA: Cardiovascular risk factors in Mexican American adults: a transcultural analysis of NHANES III, 1988–1994. *Am J Public Health* 89:723–730, 1999
24. Gardner CD, Winkleby MA, Fortmann SP: Population frequency distribution of non-high-density lipoprotein cholesterol (Third National Health and Nutrition Examination Survey [NHANES III], 1988–1994). *Am J Cardiol* 86:299–304, 2000
25. Elkeles RS, Diamond JR, El-Bahghouti N, Dhanjil S, Nicolaides A, Geroulakos G, Renton S, Anyaoku V, Richmond W, Mather H, Sharp P, the SENDCAP Study Group: Relative fasting hypoinsulinemia and ultrasonically measured early arterial disease in type 2 diabetes. *Diabet Med* 13:247–253, 1996
26. Hosoi M, Nishizawa Y, Kogawa K, Kawagishi T, Konishi T, Maekawa K, Emoto M, Fukumoto S, Shioi A, Shoji T, Inaba M, Okuno Y, Morii H: Angiotensin-converting enzyme gene polymorphism is associated with carotid arterial wall thickness in non-insulin-dependent diabetic patients. *Circulation* 94:704–707, 1996
27. King H, Aubert RE, Herman WH: Global burden of diabetes, 1995–2025: prevalence, numerical estimates and projections. *Diabetes Care* 21:1414–1431, 1998
28. Frost PH, Havel RJ: Rationale for use of non-high-density lipoprotein cholesterol rather than low-density lipoprotein cholesterol as a tool for lipoprotein cholesterol screening and assessment of risk and therapy. *Am J Cardiol* 81 (Suppl. 4A):26B–31B, 1998
29. Grundy SM: Non-high-density lipoprotein cholesterol level as a potential risk predictor and therapy target. *Arch Int Med* 161:1379–1380, 2001
30. Illingworth DR, Stein EA, Mitchel YB, Dujovne CA, Frost PH, Knopp RH, Tun P, Zupkis RV, Greguski RA: Comparative effects of lovastatin and niacin in primary hypercholesterolemia. *Arch Int Med* 154:1586–1595, 1994
31. Ballantyne CM, Andrews TC, Hsia JA, Kramer JH, Shear C, the ACCESS Study Group: Correlation of non-high-density lipoprotein cholesterol with apolipoprotein B: effect of 5 hydroxymethylglutaryl coenzyme A reductase inhibitors on non-high-density lipoprotein cholesterol levels. *Am J Cardiol* 88:265–269, 2001
32. Aguilar-Salinas CA, Fanghanel-Salmon G, Meza E, Montes J, Gulias-Herrero A, Sanchez L, Monterrubio-Flores EA, Gonzalez-Valdez H, Gomez Perez FJ: Ciprofibrate versus gemfibrozil in the treatment of mixed dyslipidemias: an open-label, multicenter study. *Metab Clin Exp* 50:1385–1386, 2001
33. Stein DT, Devaraj S, Balis D, Adams-Huet B, Jialal I: Effect of statin therapy on remnant lipoprotein cholesterol levels in patients with combined hyperlipidemia. *Arterioscler Thromb Vasc Biol* 21:2026–2031, 2001
34. Saltissi D, Morgan C, Rigby RJ, Westhuyzen J: Safety and efficacy of simvastatin in hypercholesterolemic patients undergoing chronic renal dialysis. *Am J Kidney Dis* 39:283–290, 2002
35. Dogra GK, Watts GF, Herrmann S, Thomas MA, Irish AB: Statin therapy improved brachial artery endothelial function in nephrotic syndrome. *Kidney Int* 62:550–557, 2002
36. Athyros VG, Papageorgiou AA, Mercouris BR, Athyrou VV, Symeonidis AN, Basayannis EO, Demetriadis DS, Kontopoulos AG: Treatment with atorvastatin to the National Cholesterol Education Program goal versus “usual” care in secondary coronary heart disease prevention: the Greek Atorvastatin and Coronary-heart-disease Evaluation (GREACE) Study. *Curr Med Res Opin* 18:220–228, 2002
37. Frick MH, Elo O, Haapa K, Heinonen OP, Heinsalmi P, Helo P, Huttunen JK, Kaitaniemi P, Koskinen P, Manninen V, Maenpaa H, Malkonen M, Manttari M, Norola S, Pasternack A, Pikkariainen J, Romo M, Sjoblom T, Nikkila EA: Helsinki Heart Study: primary-prevention trial with gemfibrozil in middle-aged men with dyslipidemia: safety of treatment, changes in risk factors, and incidence of coronary heart disease. *N Engl J Med* 317:1237–1245, 1987
38. Cui Y, Blumenthal RS, Whiteman MK, Flaws JA: Prediction of cardiovascular mortality (Editorial Reply). *Arch Int Med* 162:109–110, 2002
